# Supplementary material for: Evaluation of calibration performance of a low-cost particulate matter sensor using collocated and distant NO 2
Source: Copernicus journal article supplement (doi:10.5194/amt-17-3303-2024), 2024-05-31
Supplement: Supplementary file 1 [file amt-17-3303-2024-supplement.pdf]

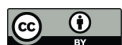

*Supplement of*

## **Evaluation of calibration performance of a low-cost particulate matter sensor using collocated and distant NO<sub>2</sub>**

**Kabseok Ko et al.**

*Correspondence to:* Seokheon Cho ([justinshcho@gmail.com](mailto:justinshcho@gmail.com))

The copyright of individual parts of the supplement might differ from the article licence.

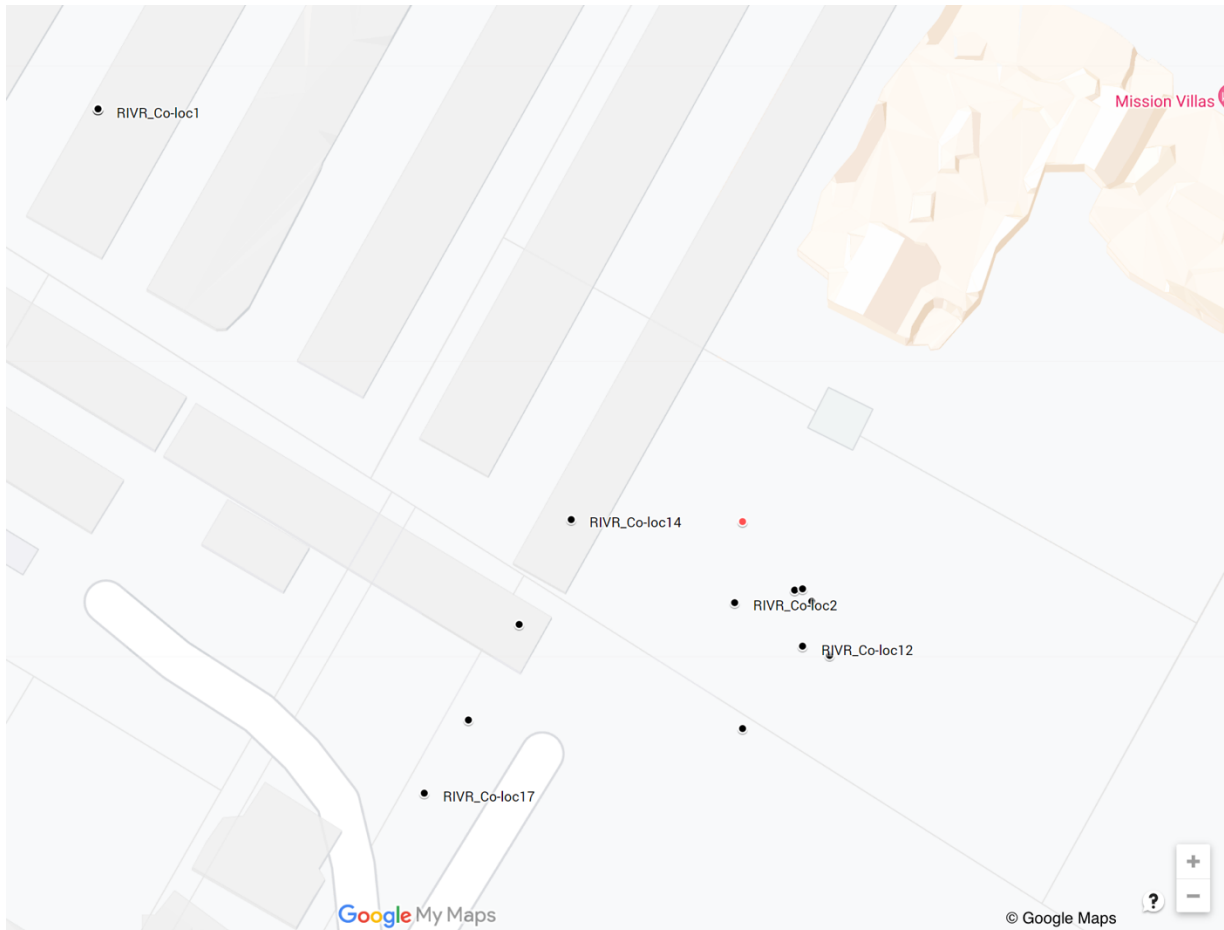

**Figure S1: Geographical locations of an air quality monitoring site (06-065-8001) and 14 PurpleAir PA-II units. The red dot represents BAM-1020 instrument, and the black dots represent 14 PurpleAir PA-II units.**

5

**Table S1 Distance of PurpleAir PA-II units from BAM-1020 instrument at the monitoring site of 06-065-8001**

|              |              |              |              |               |               |               |
|--------------|--------------|--------------|--------------|---------------|---------------|---------------|
| Sensor Name  | RIVR_Co-loc1 | RIVR_Co-loc2 | RIVR_Co-loc3 | RIVR_Co-loc4  | RIVR_Co-loc5  | RIVR_Co-loc6  |
| Distance (m) | 82.09        | 8.61         | 82.09        | 82.09         | 82.09         | 82.09         |
| Sensor Name  | RIVR_Co-loc7 | RIVR_Co-loc8 | RIVR_Co-loc9 | RIVR_Co-loc10 | RIVR_Co-loc11 | RIVR_Co-loc12 |

|              |               |               |               |               |               |       |
|--------------|---------------|---------------|---------------|---------------|---------------|-------|
| Distance (m) | 9.10          | 82.09         | 22.13         | 9.61          | 11.22         | 14.82 |
| Sensor Name  | RIVR_Co-loc13 | RIVR_Co-loc14 | RIVR_Co-loc15 | RIVR_Co-loc16 | RIVR_Co-loc17 |       |
| Distance (m) | 17.05         | 18.44         | 26.33         | 36.35         | 44.78         |       |

10 Table S2 Number of data points processed for each step of pre-processing in PA-II 7.

| Applied Method                                       | Number of data points |
|------------------------------------------------------|-----------------------|
| Original (01/01/2018 – 12/31/2019)                   | 703,369               |
| Remove data with N/A                                 | 703,369               |
| Valid data with $0 \leq \text{Temperature} \leq 200$ | 703,368               |
| Valid data with $0 \leq \text{RH} \leq 100$          | 703,339               |
| Valid data with $\text{PM}_{2.5} \leq 2,000$         | 703,339               |
| Averaging data for hourly $\text{PM}_{2.5}$          | 17,507                |
| Hourly Averaging with sufficient data points         | 17,198                |
| Comparison of PMS 5003 A and B using SPE             | 16,966                |

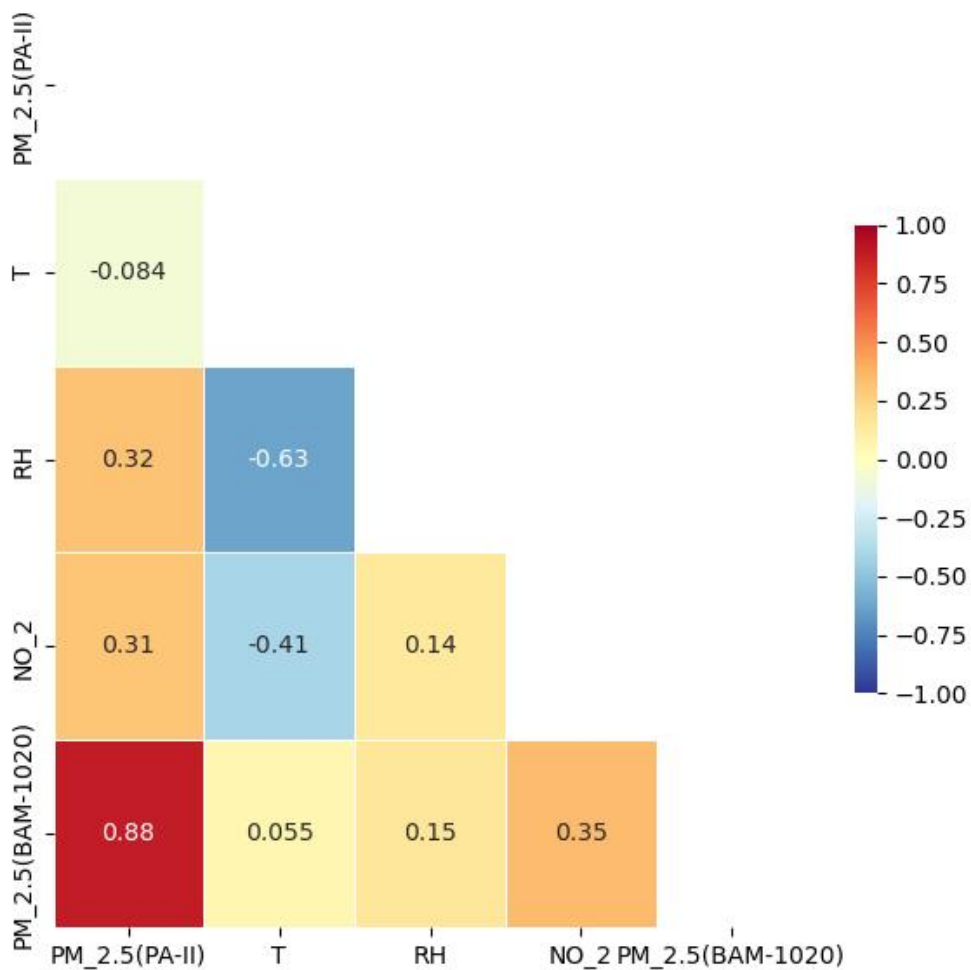

Figure S2 Correlation of feature variables,  $PM_{2.5}$  (PA-II 7), temperature, relative humidity, and  $PM_{2.5}$  (BAM-1020).

15

Table S3 Summary of MLR models and their p-values and VIF values with the selected combinations of features

|   | MLR model                          | p-values       | VIF            |
|---|------------------------------------|----------------|----------------|
| 1 | $0.460PM_{2.5} + 13.186$           | (0.000)        | X              |
| 2 | $0.466PM_{2.5} + 0.0684T + 13.186$ | (0.000, 0.000) | (1.010, 1.010) |

|    |                                                                                                                                                                |                                            |                                                   |
|----|----------------------------------------------------------------------------------------------------------------------------------------------------------------|--------------------------------------------|---------------------------------------------------|
| 3  | $0.480PM_{2.5} - 0.0535RH + 13.186$                                                                                                                            | (0.000, 0.000)                             | (1.145, 1.145)                                    |
| 4  | $0.502PM_{2.5} - 0.0631RH - 0.00243PM_{2.5} \times RH + 13.499$                                                                                                | (0.000, 0.000, 0.000)                      | (1.417, 1.203, 1.234)                             |
| 5  | $0.474PM_{2.5} + 0.0453T - 0.0313RH + 13.186$                                                                                                                  | (0.000, 0.000, 0.000)                      | (1.171, 1.582, 1.793)                             |
| 6  | $0.496PM_{2.5} + 0.0335T - 0.0457RH - 0.00217PM_{2.5} \times RH + 13.467$                                                                                      | (0.000, 0.000, 0.000, 0.000)               | (1.492, 1.650, 1.965, 1.295)                      |
| 7  | $0.495PM_{2.5} + 0.0497T - 0.0391RH - 0.00204PM_{2.5} \times RH - 0.00146T \times RH + 13.700$                                                                 | (0.000, 0.000, 0.000, 0.000, 0.000)        | (1.494, 2.132, 2.101, 1.313, 1.308)               |
| 8  | $0.488PM_{2.5} + 0.0496T - 0.0395RH - 0.00177PM_{2.5} \times T - 0.00288PM_{2.5} \times RH + 0.00187T \times RH + 13.830$                                      | (0.000, 0.000, 0.000, 0.000, 0.000, 0.000) | (1.637, 2.132, 2.101, 2.335, 2.086, 1.417)        |
| 9  | $0.500PM_{2.5} + 0.0442T - 0.0415RH - 0.00165PM_{2.5} \times T - 0.00261PM_{2.5} \times RH + 0.00196T \times RH + 0.00005PM_{2.5} \times T \times RH + 13.838$ | (0.000, 0.000, 0.000, 0.000, 0.000, 0.000) | (2.586, 2.264, 2.133, 2.360, 2.269, 1.438, 2.355) |
| 10 | $0.451PM_{2.5} + 0.0459NO_2 + 13.186$                                                                                                                          | (0.000, 0.000)                             | (1.111, 1.111)                                    |
| 11 | $0.445PM_{2.5} + 0.0461NO_2 + 0.0010PM_{2.5} \times NO_2 + 13.119$                                                                                             | (0.000, 0.000, 0.000)                      | (1.412, 1.111, 1.297)                             |
| 12 | $0.447PM_{2.5} + 0.104T + 0.107NO_2 + 13.186$                                                                                                                  | (0.000, 0.000, 0.000)                      | (1.114, 1.254, 1.379)                             |
| 13 | $0.438PM_{2.5} + 0.106T + 0.108NO_2 + 0.00148PM_{2.5} \times NO_2 + 13.083$                                                                                    | (0.000, 0.000, 0.000, 0.000)               | (1.422, 1.262, 1.382, 1.306)                      |
| 14 | $0.445PM_{2.5} + 0.110T + 0.109NO_2 + 0.00188PM_{2.5} \times T + 0.00264PM_{2.5} \times NO_2 + 13.054$                                                         | (0.000, 0.000, 0.000, 0.000, 0.000)        | (1.533, 1.283, 1.382, 1.860, 1.830)               |
| 15 | $0.4424 + 0.112T + 0.115NO_2 + 0.00170PM_{2.5} \times T + 0.00256PM_{2.5} \times NO_2 + 0.00098T \times NO_2 + 13.131$                                         | (0.000, 0.000, 0.000, 0.000, 0.000, 0.006) | (1.547, 1.382, 1.719, 2.030, 1.855, 1.376)        |
| 16 | $0.451PM_{2.5} + 0.0954T - 0.0953RH + 0.102NO_2 + 13.186$                                                                                                      | (0.000, 0.000, 0.000, 0.005)               | (1.390, 2.164, 1.980, 1.523)                      |
| 17 | $0.468PM_{2.5} + 0.0814T - 0.00223RH + 0.0913NO_2 - 0.00156PM_{2.5} \times RH + 13.388$                                                                        | (0.000, 0.000, 0.000, 0.000, 0.000)        | (1.860, 2.356, 2.252, 1.599, 1.360)               |
| 18 | $0.467PM_{2.5} + 0.102T - 0.0138RH + 0.094NO_2 - 0.00139PM_{2.5} \times RH + 0.00172T \times RH + 13.661$                                                      | (0.000, 0.000, 0.002, 0.000, 0.000, 0.000) | (1.868, 2.927, 2.418, 1.607, 1.383, 1.314)        |

|    |                                                                                                                                                                                     |                                                          |                                                                 |
|----|-------------------------------------------------------------------------------------------------------------------------------------------------------------------------------------|----------------------------------------------------------|-----------------------------------------------------------------|
| 19 | $0.462PM_{2.5} + 0.101T - 0.0147RH + 0.092NO_2 - 0.00137PM_{2.5} \times T - 0.00205PM_{2.5} \times RH + 0.00203T \times RH + 13.763$                                                | (0.000, 0.000, 0.000, 0.000, 0.000, 0.000, 0.000)        | (1.974, 2.934, 2.423, 1.620, 2.354, 2.205, 1.420)               |
| 20 | $0.462PM_{2.5} + 0.103T - 0.0110RH + 0.0935NO_2 - 0.00138PM_{2.5} \times T - 0.00225PM_{2.5} \times RH + 0.00235T \times RH + 0.00119RH \times NO_2 + 13.802$                       | (0.000, 0.000, 0.004, 0.000, 0.000, 0.000, 0.000)        | (1.976, 2.970, 2.566, 1.630, 2.353, 2.342, 1.636, 1.447)        |
| 21 | $0.461PM_{2.5} + 0.104T - 0.0130RH + 0.103NO_2 - 0.00156PM_{2.5} \times T - 0.00238PM_{2.5} \times RH + 0.00220T \times RH + 0.00159T \times NO_2 + 0.00165RH \times NO_2 + 13.895$ | (0.000, 0.000, 0.001, 0.000, 0.000, 0.000, 0.000, 0.000) | (1.977, 2.972, 2.609, 2.000, 2.437, 2.400, 1.689, 1.766, 1.674) |

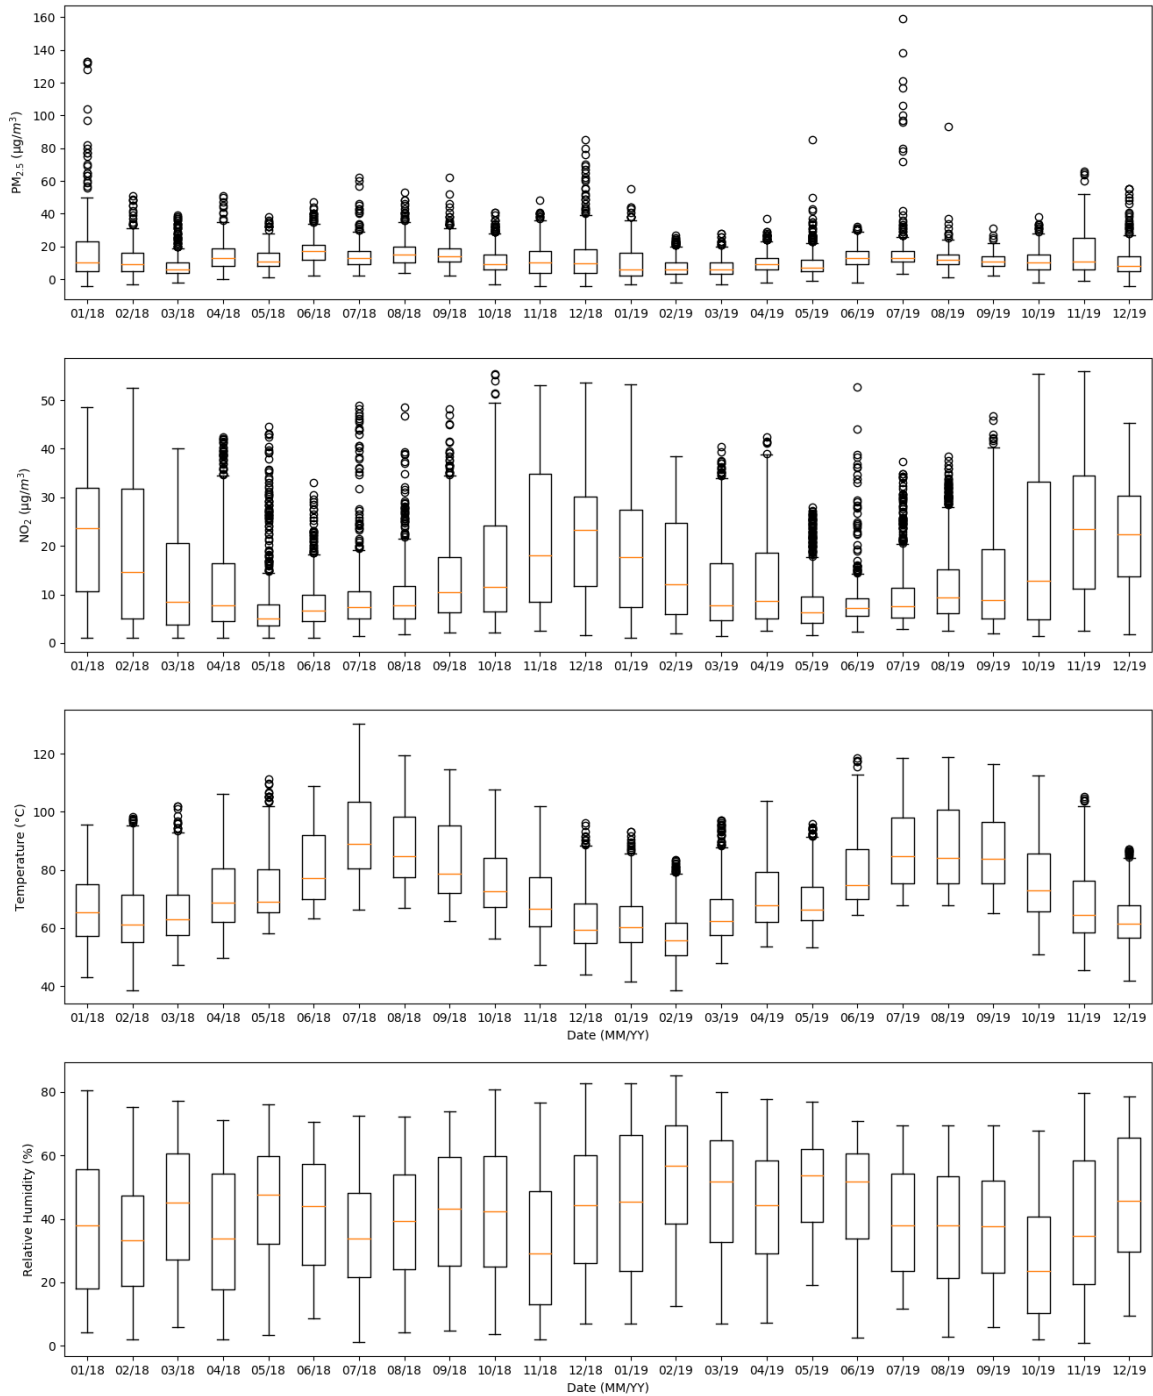

20

**Figure S3 Distributions of PM<sub>2.5</sub> (regulatory monitor), NO<sub>2</sub> (regulatory monitor), temperature (PA-II), and relative humidity (PA-II) for each month over 2-year period**

**Table S4 Effect of training periods (3, 6, 9, and 12 months) on calibration performance using MLR models**

| Feature Vector | 3              |       |       | 6              |       |       | 9              |       |       | 12             |       |       |
|----------------|----------------|-------|-------|----------------|-------|-------|----------------|-------|-------|----------------|-------|-------|
|                | R <sup>2</sup> | RMS E | MAE   | R <sup>2</sup> | RMSE  | MAE   | R <sup>2</sup> | RMSE  | MAE   | R <sup>2</sup> | RMSE  | MAE   |
| 1              | 0.738          | 4.447 | 3.193 | 0.750          | 4.344 | 3.204 | 0.729          | 4.524 | 3.436 | 0.731          | 4.513 | 3.418 |
| 2              | 0.746          | 4.382 | 3.132 | 0.775          | 4.125 | 2.925 | 0.763          | 4.231 | 3.110 | 0.755          | 4.305 | 3.194 |
| 3              | 0.752          | 4.329 | 3.094 | 0.776          | 4.111 | 2.971 | 0.761          | 4.253 | 3.163 | 0.760          | 4.263 | 3.165 |
| 4              | 0.757          | 4.286 | 3.051 | 0.779          | 4.083 | 2.930 | 0.762          | 4.237 | 3.136 | 0.763          | 4.232 | 3.132 |
| 5              | 0.743          | 4.411 | 3.171 | 0.779          | 4.090 | 2.906 | 0.767          | 4.193 | 3.080 | 0.763          | 4.234 | 3.129 |
| 6              | 0.745          | 4.393 | 3.151 | 0.782          | 4.061 | 2.869 | 0.769          | 4.182 | 3.056 | 0.765          | 4.211 | 3.100 |
| 7              | 0.749          | 4.355 | 3.127 | 0.787          | 4.012 | 2.828 | 0.779          | 4.091 | 2.964 | 0.772          | 4.154 | 3.043 |
| 8              | 0.748          | 4.364 | 3.073 | 0.786          | 4.020 | 2.823 | 0.779          | 4.087 | 2.950 | 0.772          | 4.151 | 3.023 |
| 9              | 0.742          | 4.420 | 3.058 | 0.783          | 4.051 | 2.798 | 0.778          | 4.101 | 2.940 | 0.771          | 4.161 | 3.012 |
| 10             | 0.735          | 4.477 | 3.181 | 0.762          | 4.243 | 3.100 | 0.736          | 4.470 | 3.383 | 0.741          | 4.424 | 3.329 |
| 11             | 0.721          | 4.592 | 3.208 | 0.762          | 4.246 | 3.101 | 0.736          | 4.468 | 3.382 | 0.741          | 4.423 | 3.326 |
| 12             | 0.774          | 4.133 | 2.882 | 0.806          | 3.832 | 2.651 | 0.794          | 3.946 | 2.805 | 0.789          | 3.997 | 2.871 |
| 13             | 0.762          | 4.244 | 2.880 | 0.806          | 3.832 | 2.639 | 0.794          | 3.946 | 2.806 | 0.789          | 3.993 | 2.857 |
| 14             | 0.764          | 4.226 | 2.874 | 0.811          | 3.782 | 2.579 | 0.798          | 3.908 | 2.787 | 0.792          | 3.962 | 2.843 |
| 15             | 0.762          | 4.241 | 2.888 | 0.811          | 3.775 | 2.572 | 0.799          | 3.900 | 2.783 | 0.793          | 3.954 | 2.838 |
| 16             | 0.769          | 4.178 | 2.949 | 0.805          | 3.842 | 2.646 | 0.794          | 3.950 | 2.805 | 0.790          | 3.986 | 2.866 |
| 17             | 0.769          | 4.175 | 2.944 | 0.806          | 3.833 | 2.631 | 0.793          | 3.960 | 2.804 | 0.789          | 3.990 | 2.863 |
| 18             | 0.775          | 4.126 | 2.919 | 0.807          | 3.821 | 2.663 | 0.805          | 3.840 | 2.693 | 0.798          | 3.912 | 2.793 |
| 19             | 0.770          | 4.168 | 2.900 | 0.806          | 3.831 | 2.668 | 0.805          | 3.841 | 2.693 | 0.796          | 3.925 | 2.790 |
| 20             | 0.770          | 4.170 | 2.904 | 0.803          | 3.858 | 2.690 | 0.805          | 3.835 | 2.687 | 0.797          | 3.920 | 2.782 |
| 21             | 0.765          | 4.218 | 2.936 | 0.803          | 3.860 | 2.692 | 0.805          | 3.837 | 2.690 | 0.797          | 3.913 | 2.777 |
